# Supplementary material for: Transcriptomic Analysis Reveals Candidate Genes for Female Sterility in Pomegranate Flowers
Source: Front Plant Sci. 2017 Aug 23;8:1430. doi: 10.3389/fpls.2017.01430 (PMC5572335; doi:10.3389/fpls.2017.01430)
Supplement: TABLE S4 — Kyoto Encyclopedia of Genes and Genomes (KEGG) pathway of the comparison of three stages between ATNS and TNS. [file Table_4.XLSX]

## Sheet: TNSI-ATNSI KEGG path
Enriched DEG by KEGG pathway
Genes	#Pathway	DEGs with pathway annotation(41)	Pvalue	Qvalue	KOs	Pathway ID
Gglean005469;Gglean020045;Gglean030430;Gglean010922;Gglean015730;Gglean019618;Gglean005639;Gglean021566;Gglean020316;Gglean009479;Gglean016568;Gglean027637;Gglean028251;Gglean020840	Plant-pathogen interaction	14	2.993e-13	5.6867e-12	K13424+K13447+K13416+K13464+K13448	ko04626
Gglean007256;Gglean011112;Gglean028987;Gglean010922;Gglean015730;Gglean027733;Gglean022880;Gglean020316;Gglean027637;Gglean020840	Plant hormone signal transduction	10	5.24651e-06	4.98418e-05	K14504+K14487+K14488+K13416+K13464+K14497+K14516	ko04075
Gglean013128;Gglean006641	Carotenoid biosynthesis	2	0.023749	0.132006	K09840+K09843	ko00906
Gglean027509;Gglean001501;Gglean014088	Cysteine and methionine metabolism	3	0.0320662	0.132006	K05933+K01762	ko00270
Gglean011453;Gglean026474	Phosphatidylinositol signaling system	2	0.0364018	0.132006	K00913+K00901	ko04070
Gglean011577;Gglean026892	Porphyrin and chlorophyll metabolism	2	0.0416862	0.132006	K01772+K00522	ko00860
Gglean026528	Diterpenoid biosynthesis	1	0.0750828	0.203796	K04124	ko00904
Gglean005445	Taurine and hypotaurine metabolism	1	0.0965146	0.229222	K01580	ko00430
Gglean005445	Butanoate metabolism	1	0.164513	0.347305	K01580	ko00650
Gglean019005	Tryptophan metabolism	1	0.190291	0.361552	K11816	ko00380
Gglean013128;Gglean027509;Gglean001501;Gglean014088;Gglean024922;Gglean011577;Gglean005445;Gglean026528	Biosynthesis of secondary metabolites	8	0.2639	0.397441	K09840+K05933+K01762+K09755+K01772+K01580+K04124	ko01110
Gglean021194	Basal transcription factors	1	0.268823	0.397441	K03124	ko03022
Gglean005445	beta-Alanine metabolism	1	0.302513	0.397441	K01580	ko00410
Gglean011453	Inositol phosphate metabolism	1	0.307979	0.397441	K00913	ko00562
Gglean005445	Alanine, aspartate and glutamate metabolism	1	0.318785	0.397441	K01580	ko00250
Gglean026474	Glycerolipid metabolism	1	0.334687	0.397441	K00901	ko00561
Gglean026474	Glycerophospholipid metabolism	1	0.404232	0.451789	K00901	ko00564
Gglean024922	Phenylpropanoid biosynthesis	1	0.470874	0.497033	K09755	ko00940
Gglean013128;Gglean027509;Gglean001501;Gglean014088;Gglean024922;Gglean011453;Gglean011577;Gglean005445;Gglean026474	Metabolic pathways	9	0.860792	0.860792	K09840+K05933+K01762+K09755+K00913+K01772+K01580+K00901	ko01100

## Sheet: TNSII-ATNSII KEGG path
Enriched DEG by KEGG pathway
Genes	#Pathway	DEGs with pathway annotation(809)	Pvalue	Qvalue	KOs	Pathway ID
Gglean011042;Gglean026970;Gglean027948;Gglean030256;Gglean015746;Gglean026665;Gglean001652;Gglean012455;Gglean011921;Gglean006045;Gglean010966;Gglean005396;Gglean000658;Gglean029000;Gglean004027;Gglean010161;Gglean019865;Gglean019348;Gglean017977;Gglean005484;Gglean017076;Gglean022619;Gglean021913;Gglean021312;Gglean030111;Gglean008694;Gglean012315;Gglean005043;Gglean007545;Gglean001170;Gglean000…	Ribosome	81	6.05124e-19	6.29329e-17	K02943+K02957+K02951+K02964+K02889+K02953+K02925+K02998+K02891+K02995+K02989+K02993+K02870+K02893+K02898+K02973+K02971+K02985+K02935+K02984+K02969+K02937+K02932+K02872+K02966+K02977+K02949+K02877+K02920+K02934+K02922+K02896+K02883+K02942+K02958+K02960+K02903+K02938+K02880+K02875+K02927+K02936+K02930+K02974+K02873+K02885+K02940+K02976+K02865+K02917+K02910+K02900+K02962+K02866+K02941+K02901+K02923	ko03010
Gglean000175;Gglean021230;Gglean023334;Gglean024823;Gglean023773;Gglean014170;Gglean020088;Gglean012687;Gglean027935;Gglean022946;Gglean016594;Gglean023490;Gglean015742;Gglean000549;Gglean015698;Gglean000728;Gglean026380;Gglean028130;Gglean008159;Gglean026919;Gglean010955;Gglean000814;Gglean015987;Gglean007033;Gglean018868	DNA replication	25	8.33446e-09	4.33392e-07	K07466+K10739+K02541+K02320+K02210+K04802+K02685+K02212+K02209+K02542+K02684+K10742+K02540+K04799+K02321+K02325+K02327+K10743+K10756+K02328+K03111+K02324+K10755	ko03030
Gglean010698;Gglean019676;Gglean006120;Gglean029219;Gglean023086;Gglean001486;Gglean026188;Gglean028339;Gglean028604;Gglean016513;Gglean023263	Photosynthesis - antenna proteins	11	2.377e-05	0.000824027	K08912+K08915+K08914+K08913+K08907+K08916+K08909+K08910+K08917	ko00196
Gglean000175;Gglean021230;Gglean029875;Gglean017620;Gglean013260;Gglean015183;Gglean019662;Gglean026380;Gglean028771;Gglean017621;Gglean010955;Gglean000814;Gglean019661;Gglean006718;Gglean017758;Gglean018868	Homologous recombination	16	0.000133705	0.00347633	K07466+K10739+K10901+K10875+K03165+K08775+K02327+K04482+K02328+K03111+K10870+K08991	ko03440
Gglean003845;Gglean018667;Gglean017442;Gglean018721;Gglean015430;Gglean018666;Gglean021124;Gglean017438;Gglean016263;Gglean012433	Tropane, piperidine and pyridine alkaloid biosynthesis	10	0.000288669	0.00600432	K00815+K08081+K00276	ko00960
Gglean000175;Gglean021230;Gglean014170;Gglean012099;Gglean000246;Gglean026380;Gglean008159;Gglean026919;Gglean010955;Gglean029592;Gglean000211;Gglean000814;Gglean007033;Gglean018868	Mismatch repair	14	0.00359713	0.0583278	K07466+K10739+K04802+K10746+K02327+K10756+K02328+K08737+K08735+K03111+K10755	ko03430
Gglean013185;Gglean017904;Gglean022260;Gglean017903;Gglean019921;Gglean003845;Gglean024950;Gglean018704;Gglean015430;Gglean005052;Gglean002698;Gglean012433;Gglean007511	Phenylalanine, tyrosine and tryptophan biosynthesis	13	0.00394321	0.0583278	K13832+K01626+K00815+K01735+K01657+K01850+K01696	ko00400
Gglean030338;Gglean030337;Gglean001420;Gglean030311;Gglean019246;Gglean018250;Gglean031273;Gglean023993;Gglean014737;Gglean003846;Gglean018450;Gglean017521;Gglean017277;Gglean012295;Gglean014802;Gglean026388	Valine, leucine and isoleucine degradation	16	0.00448675	0.0583278	K00166+K00826+K00128+K09699+K14085+K00253+K05605+K01969+K07513+K00167	ko00280
Gglean030413;Gglean023064;Gglean009951;Gglean000166;Gglean024451;Gglean007567;Gglean007237;Gglean024144;Gglean020650	Flavonoid biosynthesis	9	0.00666406	0.0770069	K00487+K01859+K00660+K05280+K13082+K08695+K00475	ko00941
Gglean030067;Gglean013185;Gglean017904;Gglean000756;Gglean022260;Gglean030338;Gglean017903;Gglean019921;Gglean014088;Gglean018084;Gglean030337;Gglean030692;Gglean020279;Gglean000420;Gglean030413;Gglean020057;Gglean006719;Gglean003845;Gglean019736;Gglean029332;Gglean020858;Gglean017305;Gglean024950;Gglean004122;Gglean001420;Gglean029359;Gglean018667;Gglean000025;Gglean030691;Gglean017442;Gglean004…	Biosynthesis of secondary metabolites	140	0.0256709	0.256028	K00318+K13832+K00120+K01626+K00166+K01762+K01592+K04120+K00134+K00036+K00487+K00616+K00615+K00815+K01568+K02437+K14157+K00430+K01735+K00873+K00826+K13606+K08081+K00939+K11778+K01057+K01623+K01657+K01590+K00963+K00001+K00128+K00026+K00547+K00218+K01580+K09699+K01859+K00106+K01895+K01689+K12450+K14085+K01785+K03841+K09840+K00850+K00121+K01803+K01792+K05933+K00789+K00660+K00819+K00215+K00286+K13071+…	ko01110
Gglean018084;Gglean003845;Gglean015204;Gglean027374;Gglean015430;Gglean004365;Gglean003854;Gglean030289;Gglean016263;Gglean012433	Tyrosine metabolism	10	0.0270799	0.256028	K01592+K00815+K00001+K00457+K00121+K00451+K00276	ko00350
Gglean020279;Gglean019736;Gglean004122;Gglean003576;Gglean015204;Gglean030311;Gglean029376;Gglean009606;Gglean025659;Gglean018250;Gglean015100;Gglean021686;Gglean000818;Gglean007739;Gglean004365;Gglean009703;Gglean028590;Gglean008340;Gglean021731;Gglean014737;Gglean030289;Gglean022023;Gglean018450;Gglean021875;Gglean011069;Gglean020313	Glycolysis / Gluconeogenesis	26	0.0351345	0.304499	K00134+K01568+K00873+K01623+K00001+K00128+K01895+K01689+K14085+K01785+K03841+K00850+K00121+K01803+K01792+K00162	ko00010
Gglean015204;Gglean030311;Gglean018250;Gglean004365;Gglean014737;Gglean030289;Gglean018450;Gglean021607;Gglean010523;Gglean012295;Gglean017930	Fatty acid metabolism	11	0.0401703	0.321362	K00001+K00128+K14085+K00121+K00232+K07513+K01897	ko00071
Gglean030311;Gglean018250;Gglean014737;Gglean018450;Gglean006138;Gglean004376;Gglean004375;Gglean029354	Tryptophan metabolism	8	0.0440549	0.327265	K00128+K14085+K03781+K11816	ko00380
Gglean010386;Gglean004208;Gglean021607;Gglean010523;Gglean012295	alpha-Linolenic acid metabolism	5	0.0504541	0.345564	K14674+K01047+K00232+K07513	ko00592
Gglean030692;Gglean030691;Gglean013141;Gglean011380	Diterpenoid biosynthesis	4	0.0533777	0.345564	K04120+K04125+K05282	ko00904
Gglean010386;Gglean004208	Linoleic acid metabolism	2	0.0632288	0.345564	K14674+K01047	ko00591
Gglean010780;Gglean027364;Gglean022286;Gglean001955;Gglean022723;Gglean001640;Gglean025455;Gglean012164;Gglean016021;Gglean005630;Gglean000348	Photosynthesis	11	0.0636049	0.345564	K08902+K02717+K02638+K02716+K02692+K02639+K02695+K02698+K14332+K08905+K02699	ko00195
Gglean007305;Gglean030311;Gglean018250;Gglean014737;Gglean002207;Gglean031323;Gglean018450;Gglean019820;Gglean003706;Gglean005742	Ascorbate and aldarate metabolism	10	0.0646764	0.345564	K00469+K00128+K14085+K00434+K10046+K14190	ko00053
Gglean018250;Gglean027750;Gglean009384;Gglean012697;Gglean018450	Lysine biosynthesis	5	0.0664545	0.345564	K14085+K00215+K00133+K01586	ko00300
Gglean014170;Gglean000549;Gglean000728;Gglean028807;Gglean024482;Gglean026380;Gglean026919;Gglean010955;Gglean024646;Gglean015987	Base excision repair	10	0.0749307	0.371085	K04802+K04799+K02325+K03648+K01246+K02327+K02328+K10798+K02324	ko03410
Gglean030413;Gglean003845;Gglean017305;Gglean014954;Gglean027374;Gglean015430;Gglean025624;Gglean008700;Gglean019510;Gglean016263;Gglean027152;Gglean007237;Gglean012433;Gglean026354	Phenylalanine metabolism	14	0.102285	0.478499	K00487+K00815+K00430+K00457+K10775+K00276	ko00360
Gglean018084;Gglean003845;Gglean015430;Gglean016263;Gglean012433	Isoquinoline alkaloid biosynthesis	5	0.105822	0.478499	K01592+K00815+K00276	ko00950
Gglean001420;Gglean003846;Gglean017277	Glucosinolate biosynthesis	3	0.110626	0.479379	K00826	ko00966
Gglean030440;Gglean030105;Gglean014764;Gglean007758;Gglean009148;Gglean029773;Gglean012014;Gglean014052	Fatty acid biosynthesis	8	0.120988	0.503309	K00645+K03921+K00208+K02372+K10781+K00648+K09458	ko00061
Gglean018293;Gglean025678;Gglean026231;Gglean030217;Gglean030311;Gglean006723;Gglean014737;Gglean000142;Gglean009088;Gglean021467;Gglean003520;Gglean009792;Gglean000446	Pentose and glucuronate interconversions	13	0.131522	0.526087	K01051+K01728+K00963+K00128+K01783	ko00040
Gglean023472;Gglean025900;Gglean030368;Gglean010386;Gglean004208;Gglean014706	Ether lipid metabolism	6	0.149956	0.559893	K01114+K00993+K14674+K01047	ko00565
Gglean029687	Anthocyanin biosynthesis	1	0.153278	0.559893	K12930	ko00942
Gglean003311;Gglean012650;Gglean018792;Gglean020840;Gglean017534;Gglean024737;Gglean002887;Gglean018701;Gglean019494;Gglean026888;Gglean027151;Gglean002355;Gglean006866;Gglean027733;Gglean007256;Gglean017443;Gglean021361;Gglean020323;Gglean010395;Gglean014672;Gglean009839;Gglean019720;Gglean015306;Gglean030202;Gglean020532;Gglean022184;Gglean015730;Gglean022059;Gglean003142;Gglean011957;Gglean008…	Plant hormone signal transduction	40	0.156124	0.559893	K14487+K13946+K14506+K13464+K14505+K14493+K14496+K14498+K14488+K14497+K14504+K14431+K14432+K14492+K14491+K14499+K14490+K14514	ko04075
Gglean005391;Gglean022418;Gglean018167;Gglean020879;Gglean016797	Zeatin biosynthesis	5	0.181189	0.588472	K00279+K10760	ko00908
Gglean020858;Gglean030311;Gglean018250;Gglean014737;Gglean018450	Lysine degradation	5	0.181189	0.588472	K14157+K00128+K14085	ko00310
Gglean017614;Gglean013022;Gglean013128;Gglean020950;Gglean014092;Gglean004148;Gglean002840	Carotenoid biosynthesis	7	0.186689	0.588472	K09843+K09840+K06444+K02294	ko00906
Gglean031306;Gglean026501;Gglean030373	Vitamin B6 metabolism	3	0.188229	0.588472	K08681+K06215	ko00750
Gglean000747;Gglean029332;Gglean003437;Gglean030022;Gglean027399;Gglean005840;Gglean006427;Gglean006138;Gglean018063;Gglean004376;Gglean004375	Glyoxylate and dicarboxylate metabolism	11	0.195575	0.588472	K01915+K02437+K00026+K01602+K01647+K03781+K11517	ko00630
Gglean029785;Gglean030311;Gglean018250;Gglean014737;Gglean018450;Gglean009950	Histidine metabolism	6	0.198043	0.588472	K01590+K00128+K14085+K11755	ko00340
Gglean006719;Gglean004122;Gglean003576;Gglean004413;Gglean003437;Gglean029376;Gglean021686;Gglean009703;Gglean009939;Gglean030022;Gglean000142;Gglean022023;Gglean005840;Gglean011069	Carbon fixation in photosynthetic organisms	14	0.22004	0.635671	K00615+K00873+K01623+K05298+K00026+K03841+K01803+K01602+K01783	ko00710
Gglean008506;Gglean028523;Gglean016648	Nicotinate and nicotinamide metabolism	3	0.231062	0.649471	K00278+K03517+K01950	ko00760
Gglean015227;Gglean024823;Gglean022317;Gglean020088;Gglean008399;Gglean016594;Gglean008817;Gglean015698;Gglean000728;Gglean026380;Gglean029214;Gglean010955;Gglean025235;Gglean004171;Gglean015987;Gglean003575;Gglean008760;Gglean002792;Gglean029431;Gglean028493	Pyrimidine metabolism	20	0.248714	0.671053	K10807+K02320+K01520+K02685+K10808+K02684+K01489+K02321+K02325+K02327+K00857+K02328+K01955+K03013+K02324+K00876+K03024+K03027+K01431+K01493	ko00240
Gglean030067;Gglean015227;Gglean013185;Gglean024823;Gglean022317;Gglean017904;Gglean023472;Gglean022260;Gglean019678;Gglean030338;Gglean017903;Gglean020088;Gglean008399;Gglean019921;Gglean014088;Gglean018084;Gglean030337;Gglean019566;Gglean018293;Gglean030692;Gglean016594;Gglean020279;Gglean000420;Gglean014773;Gglean030413;Gglean020057;Gglean008817;Gglean026478;Gglean015698;Gglean006719;Gglean000…	Metabolic pathways	237	0.257221	0.671053	K00318+K10807+K13832+K02320+K01520+K01114+K01626+K01988+K00166+K02685+K10808+K01762+K01592+K01738+K01051+K04120+K02684+K00134+K00036+K00558+K00487+K00616+K01489+K02321+K00615+K02325+K00278+K01915+K00815+K01568+K00645+K14157+K00430+K01735+K00873+K00826+K00975+K13606+K08730+K08081+K00058+K00939+K00208+K02327+K01057+K08912+K00993+K01623+K01657+K05298+K01590+K00963+K00001+K00128+K00026+K00547+K08902+…	ko01100
Gglean030105;Gglean030467;Gglean029773;Gglean026905;Gglean021607;Gglean010523;Gglean012295	Biosynthesis of unsaturated fatty acids	7	0.258097	0.671053	K03921+K10257+K00232+K07513	ko01040
Gglean000420;Gglean020057;Gglean006719;Gglean016386;Gglean003576;Gglean029376;Gglean021686;Gglean007739;Gglean000142;Gglean021875	Pentose phosphate pathway	10	0.267626	0.678856	K00036+K00616+K00615+K01057+K01623+K03841+K00850+K01783	ko00030
Gglean014740	Caffeine metabolism	1	0.283086	0.697068	K00106	ko00232
Gglean000175;Gglean021230;Gglean014170;Gglean000728;Gglean026380;Gglean008159;Gglean026919;Gglean010955;Gglean015987;Gglean007033;Gglean018868	Nucleotide excision repair	11	0.288211	0.697068	K07466+K10739+K04802+K02325+K02327+K10756+K02328+K02324+K10755	ko03420
Gglean014088;Gglean019566;Gglean014773;Gglean026478;Gglean003845;Gglean022625;Gglean015430;Gglean010611;Gglean010642;Gglean013446;Gglean008814;Gglean009384;Gglean003743;Gglean007846;Gglean001501;Gglean012433	Cysteine and methionine metabolism	16	0.298915	0.706527	K01762+K01738+K00558+K00815+K00547+K05933+K00789+K00133+K13034	ko00270
Gglean000756;Gglean030311;Gglean014737	Limonene and pinene degradation	3	0.365569	0.84487	K00120+K00128	ko00903
Gglean030311;Gglean000727;Gglean018250;Gglean023993;Gglean014737;Gglean018450;Gglean016263;Gglean029431	beta-Alanine metabolism	8	0.409093	0.911467	K00128+K01580+K14085+K05605+K00276+K01431	ko00410
Gglean030413;Gglean007237	Stilbenoid, diarylheptanoid and gingerol biosynthesis	2	0.411913	0.911467	K00487	ko00945
Gglean023517;Gglean010386;Gglean004208	Arachidonic acid metabolism	3	0.453679	0.949441	K00432+K14674+K01047	ko00590
Gglean019678;Gglean003133;Gglean021714	Glycosphingolipid biosynthesis - globo series	3	0.453679	0.949441	K01988+K07407	ko00603
Gglean015227;Gglean024823;Gglean020088;Gglean008399;Gglean016594;Gglean015698;Gglean000728;Gglean004122;Gglean000025;Gglean026380;Gglean014972;Gglean014740;Gglean010955;Gglean028502;Gglean004171;Gglean022023;Gglean015987;Gglean011069;Gglean008760;Gglean002792;Gglean002299;Gglean026687	Purine metabolism	22	0.456462	0.949441	K10807+K02320+K02685+K10808+K02684+K02321+K02325+K00873+K00939+K02327+K13811+K00106+K02328+K03013+K02324+K03024+K03027+K00759	ko00230
Gglean026892;Gglean029359;Gglean009200;Gglean003828;Gglean001804;Gglean011652;Gglean021093	Porphyrin and chlorophyll metabolism	7	0.469487	0.957386	K00522+K13606+K00510+K00218+K13071+K03403	ko00860
Gglean008506;Gglean000747;Gglean000727;Gglean025235;Gglean000912;Gglean019650;Gglean013488;Gglean030903	Alanine, aspartate and glutamate metabolism	8	0.483336	0.966672	K00278+K01915+K01580+K01955+K00294+K00827+K00820+K01953	ko00250
Gglean005277;Gglean011334;Gglean010522;Gglean014201;Gglean018647;Gglean014966;Gglean028435;Gglean014695;Gglean005298;Gglean011450;Gglean005300;Gglean016060	Phagosome	12	0.504533	0.975012	K01365+K07375+K04392+K05692+K07374	ko04145
Gglean030217;Gglean003133;Gglean007739;Gglean026987;Gglean021875;Gglean014047;Gglean002974	Galactose metabolism	7	0.521513	0.975012	K00963+K07407+K00850+K01193+K01784+K01187	ko00052
Gglean010522;Gglean004017;Gglean007378	Natural killer cell mediated cytotoxicity	3	0.536267	0.975012	K04392+K04371+K04368	ko04650
Gglean006812;Gglean018250;Gglean019650;Gglean009384;Gglean018450;Gglean024216;Gglean016263;Gglean007511	Glycine, serine and threonine metabolism	8	0.554955	0.975012	K00058+K14085+K00827+K00133+K00276+K01696	ko00260
Gglean030311;Gglean018250;Gglean003133;Gglean014737;Gglean024163;Gglean018450;Gglean010386;Gglean021718	Glycerolipid metabolism	8	0.554955	0.975012	K00128+K14085+K07407+K00864+K14674+K06119	ko00561
Gglean015227;Gglean008399;Gglean000420;Gglean002938;Gglean023517;Gglean002937;Gglean014208;Gglean002207;Gglean031323;Gglean004945	Glutathione metabolism	10	0.568985	0.975012	K10807+K10808+K00036+K00799+K00432+K01919+K00434	ko00480
Gglean001420;Gglean003846;Gglean017277;Gglean020313	Valine, leucine and isoleucine biosynthesis	4	0.580266	0.975012	K00826+K00162	ko00290
Gglean030311;Gglean009606;Gglean018250;Gglean023993;Gglean014737;Gglean018450	Propanoate metabolism	6	0.590708	0.975012	K00128+K01895+K14085+K05605	ko00640
Gglean023472;Gglean007305;Gglean030368;Gglean009703;Gglean018147;Gglean014706;Gglean018773	Inositol phosphate metabolism	7	0.595603	0.975012	K01114+K00469+K01803+K00889	ko00562
Gglean030413;Gglean017305;Gglean014954;Gglean025624;Gglean008700;Gglean012302;Gglean020620;Gglean019510;Gglean020363;Gglean027152;Gglean007237;Gglean026354	Phenylpropanoid biosynthesis	12	0.59931	0.975012	K00487+K00430+K10775+K05350+K09755+K12356	ko00940
Gglean001420;Gglean003846;Gglean017277;Gglean029431	Pantothenate and CoA biosynthesis	4	0.611599	0.975012	K00826+K01431	ko00770
Gglean007433;Gglean004026	Riboflavin metabolism	2	0.614731	0.975012	K00861+K14652	ko00740
Gglean025501	Brassinosteroid biosynthesis	1	0.631683	0.975012	K09587	ko00905
Gglean019566;Gglean014972;Gglean003743;Gglean007846	Sulfur metabolism	4	0.641446	0.975012	K01738+K13811+K13034	ko00920
Gglean003576;Gglean029376;Gglean021686;Gglean007739;Gglean009703;Gglean021875;Gglean027580	Fructose and mannose metabolism	7	0.64157	0.975012	K01623+K03841+K00850+K01803+K00895	ko00051
Gglean014740;Gglean021607;Gglean010523;Gglean006138;Gglean012295;Gglean018063;Gglean017930;Gglean004376;Gglean004375	Peroxisome	9	0.645141	0.975012	K00106+K00232+K03781+K07513+K11517+K01897	ko04146
Gglean004122;Gglean030311;Gglean003437;Gglean009606;Gglean018250;Gglean014737;Gglean022023;Gglean018450;Gglean027600;Gglean005840;Gglean011069;Gglean020313	Pyruvate metabolism	12	0.651985	0.975012	K00873+K00128+K00026+K01895+K14085+K01759+K00162	ko00620
Gglean009951;Gglean024144	Circadian rhythm - plant	2	0.656258	0.975012	K00660	ko04712
Gglean000166	Flavone and flavonol biosynthesis	1	0.688202	0.994069	K05280	ko00944
Gglean007250	Biotin metabolism	1	0.688202	0.994069	K00833	ko00780
Gglean003133;Gglean015717;Gglean017003	Sphingolipid metabolism	3	0.707557	0.999986	K07407+K01634+K04712	ko00600
Gglean010386;Gglean017427;Gglean008094	Steroid biosynthesis	3	0.760881	0.999986	K14674+K14424+K09828	ko00100
Gglean003845;Gglean027374;Gglean015430;Gglean012433	Ubiquinone and other terpenoid-quinone biosynthesis	4	0.787688	0.999986	K00815+K00457	ko00130
Gglean004017;Gglean015907;Gglean020840;Gglean000647;Gglean002891;Gglean021524;Gglean005639;Gglean010387;Gglean030430;Gglean020310;Gglean013805;Gglean024163;Gglean025195;Gglean015730;Gglean007378;Gglean004044;Gglean017619	Plant-pathogen interaction	17	0.798691	0.999986	K04371+K13448+K13464+K13456+K02358+K13424+K13430+K00864+K04368+K04079	ko04626
Gglean023472;Gglean018982;Gglean025900;Gglean030368;Gglean012060;Gglean010386;Gglean004208;Gglean014706	Glycerophospholipid metabolism	8	0.814046	0.999986	K01114+K08730+K00993+K01126+K14674+K01047	ko00564
Gglean000747;Gglean002254;Gglean028961;Gglean004577;Gglean030903	Nitrogen metabolism	5	0.826251	0.999986	K01915+K00360+K01674+K01673+K01953	ko00910
Gglean022114	ABC transporters	1	0.839923	0.999986	K05658	ko02010
Gglean003437;Gglean027399;Gglean005840;Gglean006427;Gglean020313;Gglean028893	Citrate cycle (TCA cycle)	6	0.843397	0.999986	K00026+K01647+K00162+K00030	ko00020
Gglean000549	Non-homologous end-joining	1	0.86451	0.999986	K04799	ko03450
Gglean000727	Taurine and hypotaurine metabolism	1	0.885325	0.999986	K01580	ko00430
Gglean030067;Gglean000747;Gglean030311;Gglean018250;Gglean008869;Gglean014737;Gglean013400;Gglean000912;Gglean010920;Gglean018450	Arginine and proline metabolism	10	0.886527	0.999986	K00318+K01915+K00128+K14085+K01583+K00819+K00294+K00286	ko00330
Gglean000727;Gglean020313	Butanoate metabolism	2	0.888071	0.999986	K01580+K00162	ko00650
Gglean020574	Regulation of autophagy	1	0.902945	0.999986	K08341	ko04140
Gglean012068	Glycosaminoglycan degradation	1	0.902945	0.999986	K07964	ko00531
Gglean027898;Gglean004383;Gglean028216;Gglean007532	N-Glycan biosynthesis	4	0.904079	0.999986	K01230+K12666+K07151+K03846	ko00510
Gglean018293;Gglean006395;Gglean030217;Gglean006723;Gglean007959;Gglean026987;Gglean024635;Gglean009088;Gglean012302;Gglean016626;Gglean030356;Gglean002974;Gglean021467;Gglean000446	Starch and sucrose metabolism	14	0.905109	0.999986	K01051+K00975+K00963+K01176+K01193+K00695+K05350+K01194+K00688+K01187	ko00500
Gglean014511;Gglean012302;Gglean007846	Cyanoamino acid metabolism	3	0.930138	0.999986	K13035+K05350+K13034	ko00460
Gglean021990;Gglean008202;Gglean002636;Gglean025717;Gglean018249;Gglean002988;Gglean031190;Gglean028500;Gglean031191	Ribosome biogenesis in eukaryotes	9	0.932985	0.999986	K14563+K12845+K11131+K14565+K14567+K14558+K14564+K14546	ko03008
Gglean014723;Gglean027688;Gglean013569;Gglean018514;Gglean007391;Gglean003415;Gglean008781;Gglean014771;Gglean030895;Gglean005629;Gglean022334;Gglean030896	Ubiquitin mediated proteolysis	12	0.93455	0.999986	K06688+K03363+K10575+K03348+K03353+K06689+K04506+K03178+K10688	ko04120
Gglean031188	Circadian rhythm - mammal	1	0.941174	0.999986	K02295	ko04710
Gglean024132;Gglean016475;Gglean017032;Gglean018147;Gglean026236;Gglean026707;Gglean018773	Endocytosis	7	0.95002	0.999986	K03283+K12486+K00889+K12193	ko04144
Gglean014972	Selenocompound metabolism	1	0.95022	0.999986	K13811	ko00450
Gglean004171;Gglean008760;Gglean002792	RNA polymerase	3	0.966522	0.999986	K03013+K03024+K03027	ko03020
Gglean004203;Gglean025174;Gglean023754;Gglean018335;Gglean012862	Terpenoid backbone biosynthesis	5	0.967648	0.999986	K11778+K13789+K01823+K00021	ko00900
Gglean024132;Gglean006419;Gglean016475;Gglean013569;Gglean027898;Gglean015456;Gglean023721;Gglean004383;Gglean019690;Gglean008781;Gglean028216;Gglean005629;Gglean000053;Gglean004044;Gglean026707;Gglean004079	Protein processing in endoplasmic reticulum	16	0.974072	0.999986	K03283+K13993+K10575+K01230+K12666+K06689+K07151+K13525+K04079	ko04141
Gglean013257	SNARE interactions in vesicular transport	1	0.981733	0.999986	K08489	ko04130
Gglean018147;Gglean018773	Phosphatidylinositol signaling system	2	0.987967	0.999986	K00889	ko04070
Gglean021739;Gglean023076;Gglean023020;Gglean029786;Gglean010016;Gglean023016;Gglean030645;Gglean030239;Gglean018274;Gglean015018;Gglean031147;Gglean008985;Gglean005713;Gglean019334	RNA transport	14	0.993064	0.999986	K14293+K03231+K14297+K12160+K14319+K03246+K14301+K14314+K14298+K14310+K03113+K14306	ko03013
Gglean015142;Gglean013811;Gglean025659;Gglean000818;Gglean000625;Gglean024770	RNA degradation	6	0.995478	0.999986	K04077+K04043+K01689	ko03018
Gglean006395;Gglean030217;Gglean027397;Gglean014047;Gglean013488;Gglean019820	Amino sugar and nucleotide sugar metabolism	6	0.996803	0.999986	K00975+K00963+K12450+K01784+K00820+K10046	ko00520
Gglean025588;Gglean007098;Gglean026536;Gglean009275;Gglean001463;Gglean008035;Gglean018392;Gglean031210	Oxidative phosphorylation	8	0.999732	0.999986	K01535+K01507+K02265+K03955	ko00190
Gglean024132;Gglean016475;Gglean028016;Gglean023997;Gglean014978;Gglean008202;Gglean026707;Gglean006199	Spliceosome	8	0.999986	0.999986	K03283+K12854+K11086+K12816+K12845+K12842	ko03040

## Sheet: TNSIII-ATNSIII KEGG path
Enriched DEG by KEGG pathway
Genes	#Pathway	DEGs with pathway annotation (452)	Pvalue	Qvalue	KOs	Pathway ID
Gglean026919;Gglean000175;Gglean024823;Gglean021230;Gglean000549;Gglean023490;Gglean016594;Gglean027935;Gglean014170;Gglean012687;Gglean015742;Gglean023773;Gglean023334;Gglean028130;Gglean020088	DNA replication	15	1.0505e-05	0.00100848	K04802+K07466+K02320+K10739+K04799+K10742+K02684+K02209+K02212+K02540+K02210+K02541+K10743+K02685	ko03030
Gglean022332;Gglean018745;Gglean020363;Gglean007237;Gglean016949;Gglean031226;Gglean024922;Gglean009129;Gglean017305;Gglean019510;Gglean031223;Gglean025898;Gglean026354;Gglean017523;Gglean023363;Gglean018938;Gglean012302	Phenylpropanoid biosynthesis	17	0.000392162	0.0186749	K00430+K12356+K00487+K13065+K09755+K12355+K09753+K00588+K09754+K05350	ko00940
Gglean007237;Gglean024144;Gglean009951;Gglean031226;Gglean000166;Gglean017523;Gglean023363;Gglean015855	Flavonoid biosynthesis	8	0.00058359	0.0186749	K00487+K00660+K13065+K05280+K00588+K09754+K13083	ko00941
Gglean014484;Gglean013022;Gglean002840;Gglean016010;Gglean013128;Gglean004148;Gglean015767;Gglean014092;Gglean003899	Carotenoid biosynthesis	9	0.000833461	0.0200031	K09842+K09843+K09840+K14593+K02294+K02291	ko00906
Gglean018701;Gglean012650;Gglean019494;Gglean027133;Gglean021329;Gglean005695;Gglean023699;Gglean008003;Gglean009839;Gglean027733;Gglean028836;Gglean016662;Gglean026888;Gglean002355;Gglean017443;Gglean017534;Gglean020316;Gglean018005;Gglean004119;Gglean022404;Gglean024737;Gglean014178;Gglean022853;Gglean018149;Gglean020532;Gglean010395;Gglean006866;Gglean022184;Gglean003311;Gglean002887;Gglean027…	Plant hormone signal transduction	32	0.00228795	0.0439286	K13946+K14505+K14488+K14487+K14486+K14499+K14497+K14490+K14496+K13464+K14493+K14509+K14492+K14498+K14431	ko04075
Gglean006120;Gglean029219;Gglean023086;Gglean019676;Gglean016513;Gglean028339	Photosynthesis - antenna proteins	6	0.00393903	0.0630245	K08914+K08913+K08907+K08915+K08917+K08910	ko00196
Gglean007237;Gglean031226;Gglean017523;Gglean023363	Stilbenoid, diarylheptanoid and gingerol biosynthesis	4	0.00471922	0.0647208	K00487+K13065+K00588+K09754	ko00945
Gglean026400;Gglean022265;Gglean018250;Gglean015204;Gglean017930;Gglean028207;Gglean017488;Gglean004365;Gglean000447	Fatty acid metabolism	9	0.00671126	0.0769242	K00001+K00121+K14085+K01897	ko00071
Gglean008860;Gglean022332;Gglean018745;Gglean016263;Gglean007237;Gglean016949;Gglean017305;Gglean019510;Gglean025898;Gglean026354;Gglean017523;Gglean018938	Phenylalanine metabolism	12	0.00721164	0.0769242	K00276+K00430+K00487+K00588	ko00360
Gglean022138;Gglean000166;Gglean015855	Flavone and flavonol biosynthesis	3	0.0168123	0.161398	K05279+K05280+K13083	ko00944
Gglean004208;Gglean010386	Linoleic acid metabolism	2	0.0207088	0.167768	K01047+K14674	ko00591
Gglean014484;Gglean008860;Gglean022332;Gglean018745;Gglean025174;Gglean016263;Gglean010611;Gglean029332;Gglean007237;Gglean026400;Gglean021686;Gglean024144;Gglean011482;Gglean018710;Gglean011652;Gglean029785;Gglean013446;Gglean009951;Gglean022265;Gglean021731;Gglean021093;Gglean019736;Gglean002840;Gglean016949;Gglean002698;Gglean022260;Gglean001501;Gglean003828;Gglean015100;Gglean000818;Gglean031…	Biosynthesis of secondary metabolites	83	0.0222852	0.167768	K09842+K00276+K00430+K13789+K05933+K02437+K00487+K00001+K03841+K00660+K01762+K09588+K00218+K01590+K00789+K00121+K01568+K03403+K09840+K01626+K01785+K01689+K13065+K09755+K13606+K01640+K01623+K13832+K13648+K14085+K00826+K01620+K00873+K00600+K08242+K02294+K01953+K08081+K01696+K01580+K01895+K09753+K00166+K05280+K10717+K14157+K00588+K00820+K01850+K00106+K13071+K02291+K01792+K00819+K09754+K00286+K13083+…	ko01110
Gglean008860;Gglean016263;Gglean026400;Gglean022265;Gglean015204;Gglean028207;Gglean004365	Tyrosine metabolism	7	0.0227186	0.167768	K00276+K00001+K00121	ko00350
Gglean008860;Gglean016263;Gglean018250;Gglean018337;Gglean021218;Gglean003099;Gglean007511;Gglean006812;Gglean006768	Glycine, serine and threonine metabolism	9	0.0305464	0.209461	K00276+K14085+K00831+K01620+K00600+K01696+K00058	ko00260
Gglean019731;Gglean031306;Gglean018337	Vitamin B6 metabolism	3	0.0475124	0.304008	K06215+K08681+K00831	ko00750
Gglean029875;Gglean000175;Gglean028771;Gglean021230;Gglean015183;Gglean017620;Gglean013260	Homologous recombination	7	0.050668	0.304008	K10901+K07466+K04482+K10739+K03165+K10875	ko03440
Gglean026919;Gglean000175;Gglean000246;Gglean021230;Gglean029592;Gglean014170;Gglean012099	Mismatch repair	7	0.0703898	0.391039	K04802+K07466+K10746+K10739+K08737	ko03430
Gglean025678;Gglean026231;Gglean012939;Gglean003520;Gglean020130;Gglean018293;Gglean024763;Gglean000446;Gglean013281	Pentose and glucuronate interconversions	9	0.0733199	0.391039	K01728+K01051	ko00040
Gglean026400;Gglean021686;Gglean022265;Gglean021731;Gglean019736;Gglean015100;Gglean000818;Gglean004646;Gglean018250;Gglean015204;Gglean004122;Gglean009606;Gglean028207;Gglean004365;Gglean008340	Glycolysis / Gluconeogenesis	15	0.0818629	0.392232	K00001+K03841+K00121+K01568+K01785+K01689+K01623+K14085+K00873+K01895+K01792	ko00010
Gglean008860;Gglean016263;Gglean018667;Gglean017442	Tropane, piperidine and pyridine alkaloid biosynthesis	4	0.0858007	0.392232	K00276+K08081	ko00960
Gglean021196;Gglean005419;Gglean004891;Gglean018167	Zeatin biosynthesis	4	0.0858007	0.392232	K13495+K00279+K10717	ko00908
Gglean010522;Gglean018647;Gglean005277;Gglean014966;Gglean028435;Gglean014201;Gglean011334;Gglean010906;Gglean014695;Gglean023903	Phagosome	10	0.112057	0.488978	K04392+K05692+K01365+K07375	ko04145
Gglean026919;Gglean000549;Gglean014170;Gglean009259;Gglean028807;Gglean028379	Base excision repair	6	0.122686	0.512081	K04802+K04799+K01246+K03648+K10773	ko03410
Gglean004208;Gglean023517;Gglean010386	Arachidonic acid metabolism	3	0.152	0.608	K01047+K00432+K14674	ko00590
Gglean014740	Caffeine metabolism	1	0.163958	0.629598	K00106	ko00232
Gglean010522;Gglean003939;Gglean023903	Natural killer cell mediated cytotoxicity	3	0.19584	0.712925	K04392+K04371	ko04650
Gglean008399;Gglean015227;Gglean024689;Gglean004945;Gglean023517;Gglean031323;Gglean020020;Gglean025126	Glutathione metabolism	8	0.20051	0.712925	K10808+K10807+K00799+K00432+K00434	ko00480
Gglean002698;Gglean022260;Gglean013186;Gglean007511;Gglean005052	Phenylalanine, tyrosine and tryptophan biosynthesis	5	0.238495	0.792001	K01626+K13832+K01696+K01850	ko00400
Gglean010611;Gglean014773;Gglean011482;Gglean013446;Gglean001501;Gglean012792;Gglean007846;Gglean029965;Gglean014088;Gglean008814	Cysteine and methionine metabolism	10	0.23925	0.792001	K05933+K00558+K01762+K00789+K01244+K13034+K01738	ko00270
Gglean011652;Gglean021093;Gglean003828;Gglean029359;Gglean001804	Porphyrin and chlorophyll metabolism	5	0.288894	0.922582	K00218+K03403+K13606+K13071	ko00860
Gglean023993;Gglean015859;Gglean018250;Gglean017277;Gglean026388;Gglean030338	Valine, leucine and isoleucine degradation	6	0.299477	0.922582	K05605+K01640+K14085+K00826+K00166	ko00280
Gglean000727;Gglean008130	Taurine and hypotaurine metabolism	2	0.307527	0.922582	K01580+K10712	ko00430
Gglean024310;Gglean030903;Gglean002254;Gglean004577;Gglean016280	Nitrogen metabolism	5	0.323493	0.932935	K00360+K01953+K01673	ko00910
Gglean004208;Gglean010386	alpha-Linolenic acid metabolism	2	0.340132	0.932935	K01047+K14674	ko00592
Gglean024144;Gglean009951	Circadian rhythm - plant	2	0.340132	0.932935	K00660	ko04712
Gglean008860;Gglean016263;Gglean023993;Gglean018250;Gglean000727	beta-Alanine metabolism	5	0.358513	0.941899	K00276+K05605+K14085+K01580	ko00410
Gglean019978;Gglean022287;Gglean010386	Steroid biosynthesis	3	0.363023	0.941899	K14423+K08242+K14674	ko00100
Gglean017009;Gglean019678	Glycosphingolipid biosynthesis - globo series	2	0.403707	0.993298	K01988	ko00603
Gglean015859	Synthesis and degradation of ketone bodies	1	0.415759	0.993298	K01640	ko00072
Gglean018710	Brassinosteroid biosynthesis	1	0.415759	0.993298	K09588	ko00905
Gglean008860;Gglean016263	Isoquinoline alkaloid biosynthesis	2	0.434398	0.993298	K00276	ko00950
Gglean007846;Gglean029965;Gglean022778	Sulfur metabolism	3	0.434568	0.993298	K13034+K01738+K13811	ko00920
Gglean002404;Gglean018250;Gglean024163;Gglean010386;Gglean021717	Glycerolipid metabolism	5	0.463192	1	K13508+K14085+K00864+K14674	ko00561
Gglean018293;Gglean012769;Gglean002974;Gglean003789;Gglean023536;Gglean024763;Gglean006871;Gglean006395;Gglean000446;Gglean013281;Gglean012302	Starch and sucrose metabolism	11	0.464581	1	K01051+K01179+K01187+K13648+K00847+K08679+K00975+K05350	ko00500
Gglean014484;Gglean008860;Gglean022332;Gglean018745;Gglean025174;Gglean008869;Gglean008399;Gglean016263;Gglean010611;Gglean014773;Gglean004208;Gglean007237;Gglean023993;Gglean026400;Gglean021686;Gglean015227;Gglean024144;Gglean011482;Gglean011652;Gglean029785;Gglean018982;Gglean026687;Gglean007758;Gglean013446;Gglean009951;Gglean022265;Gglean019978;Gglean021731;Gglean021093;Gglean019736;Gglean010…	Metabolic pathways	129	0.469472	1	K09842+K00276+K00430+K13789+K01583+K10808+K05933+K00558+K01047+K00487+K05605+K00001+K03841+K10807+K00660+K01762+K00218+K01590+K08730+K00759+K02372+K00789+K00121+K14423+K01568+K03403+K09840+K08914+K08913+K01626+K02320+K01230+K01051+K13508+K01520+K01179+K01689+K09755+K01187+K13606+K01640+K01623+K01244+K13034+K08915+K10781+K13832+K14085+K00831+K05298+K01738+K02684+K00847+K00826+K01620+K00873+K00600+…	ko01100
Gglean017277	Glucosinolate biosynthesis	1	0.511654	1	K00826	ko00966
Gglean018250;Gglean020858	Lysine degradation	2	0.52096	1	K14085+K14157	ko00310
Gglean001955;Gglean016021;Gglean012164;Gglean000348	Photosynthesis	4	0.527679	1	K02716+K14332+K02698+K02699	ko00195
Gglean007758;Gglean009148;Gglean029773	Fatty acid biosynthesis	3	0.546082	1	K02372+K10781+K03921	ko00061
Gglean000647;Gglean021524;Gglean030430;Gglean021566;Gglean020316;Gglean017943;Gglean003939;Gglean024163;Gglean023146;Gglean028527;Gglean027637	Plant-pathogen interaction	11	0.563524	1	K13456+K13448+K13424+K13464+K13447+K04371+K00864+K13412+K02358	ko04626
Gglean013141	Diterpenoid biosynthesis	1	0.591839	1	K04125	ko00904
Gglean015859;Gglean000727	Butanoate metabolism	2	0.598212	1	K01640+K01580	ko00650
Gglean007846;Gglean003099;Gglean012302	Cyanoamino acid metabolism	3	0.606501	1	K13034+K00600+K05350	ko00460
Gglean004208;Gglean010386	Ether lipid metabolism	2	0.621796	1	K01047+K14674	ko00565
Gglean012089	ABC transporters	1	0.626859	1	K05658	ko02010
Gglean028523	Nicotinate and nicotinamide metabolism	1	0.626859	1	K03517	ko00760
Gglean015859;Gglean017930;Gglean017488;Gglean014740;Gglean000447	Peroxisome	5	0.637288	1	K01640+K01897+K00106	ko04146
Gglean000549	Non-homologous end-joining	1	0.658881	1	K04799	ko03450
Gglean018250;Gglean031323;Gglean025126	Ascorbate and aldarate metabolism	3	0.661343	1	K14085+K00434	ko00053
Gglean029785;Gglean018250	Histidine metabolism	2	0.665729	1	K01590+K14085	ko00340
Gglean004208;Gglean018982;Gglean002404;Gglean010386;Gglean021717	Glycerophospholipid metabolism	5	0.678288	1	K01047+K08730+K13508+K14674	ko00564
Gglean023993;Gglean018250;Gglean009606	Propanoate metabolism	3	0.678347	1	K05605+K14085+K01895	ko00640
Gglean029354;Gglean018250	Tryptophan metabolism	2	0.686109	1	K11816+K14085	ko00380
Gglean018250	Lysine biosynthesis	1	0.73941	1	K14085	ko00300
Gglean026919;Gglean000175;Gglean021230;Gglean014170	Nucleotide excision repair	4	0.756425	1	K04802+K07466+K10739	ko03420
Gglean022778	Selenocompound metabolism	1	0.80096	1	K13811	ko00450
Gglean030903;Gglean000727;Gglean013488	Alanine, aspartate and glutamate metabolism	3	0.803481	1	K01953+K01580+K00820	ko00250
Gglean021686;Gglean004646;Gglean023536	Fructose and mannose metabolism	3	0.803481	1	K03841+K01623+K00847	ko00051
Gglean003099	One carbon pool by folate	1	0.818064	1	K00600	ko00670
Gglean008399;Gglean015227;Gglean026687;Gglean024823;Gglean016594;Gglean004122;Gglean022778;Gglean014740;Gglean020088	Purine metabolism	9	0.847885	1	K10808+K10807+K00759+K02320+K02684+K00873+K13811+K00106+K02685	ko00230
Gglean017003	Sphingolipid metabolism	1	0.873014	1	K04712	ko00600
Gglean021686;Gglean004646;Gglean009939;Gglean004122	Carbon fixation in photosynthetic organisms	4	0.882757	1	K03841+K01623+K05298+K00873	ko00710
Gglean008869;Gglean010697;Gglean018250;Gglean013400;Gglean010920	Arginine and proline metabolism	5	0.883715	1	K01583+K14085+K00819+K00286	ko00330
Gglean027898;Gglean007532	N-Glycan biosynthesis	2	0.88613	1	K01230+K03846	ko00510
Gglean003789;Gglean023536;Gglean006871;Gglean006395;Gglean013488	Amino sugar and nucleotide sugar metabolism	5	0.900388	1	K13648+K00847+K08679+K00975+K00820	ko00520
Gglean007642;Gglean019822	Protein export	2	0.901294	1	K03106+K03116	ko03060
Gglean017277	Valine, leucine and isoleucine biosynthesis	1	0.903049	1	K00826	ko00290
Gglean017277	Pantothenate and CoA biosynthesis	1	0.911393	1	K00826	ko00770
Gglean008399;Gglean015227;Gglean024823;Gglean022317;Gglean016594;Gglean020088	Pyrimidine metabolism	6	0.923334	1	K10808+K10807+K02320+K01520+K02684+K02685	ko00240
Gglean003757;Gglean018250;Gglean004122;Gglean009606	Pyruvate metabolism	4	0.937667	1	K01759+K14085+K00873+K01895	ko00620
Gglean021686;Gglean004646	Pentose phosphate pathway	2	0.945004	1	K03841+K01623	ko00030
Gglean029332;Gglean003099	Glyoxylate and dicarboxylate metabolism	2	0.952623	1	K02437+K00600	ko00630
Gglean029773	Biosynthesis of unsaturated fatty acids	1	0.95283	1	K03921	ko01040
Gglean001423	Ubiquinone and other terpenoid-quinone biosynthesis	1	0.95283	1	K09834	ko00130
Gglean016475;Gglean024132;Gglean017032	Endocytosis	3	0.959044	1	K03283+K12486	ko04144
Gglean002974	Galactose metabolism	1	0.980864	1	K01187	ko00052
Gglean011985	Citrate cycle (TCA cycle)	1	0.991517	1	K01648	ko00020
Gglean015456;Gglean016475;Gglean024132;Gglean027898;Gglean023721;Gglean006419	Protein processing in endoplasmic reticulum	6	0.993599	1	K13993+K03283+K01230	ko04141
Gglean025174	Terpenoid backbone biosynthesis	1	0.995889	1	K13789	ko00900
Gglean027688;Gglean007391;Gglean014723	Ubiquitin mediated proteolysis	3	0.997075	1	K03363+K06688	ko04120
Gglean003270	Aminoacyl-tRNA biosynthesis	1	0.999443	1	K01869	ko00970
Gglean000818	RNA degradation	1	0.999646	1	K01689	ko03018
Gglean016475;Gglean024132	Spliceosome	2	0.999989	1	K03283	ko03040
Gglean025588	Oxidative phosphorylation	1	0.999994	1	K01535	ko00190
Gglean010016	RNA transport	1	0.999999	1	K12160	ko03013
Gglean026110;Gglean008498	Ribosome	2	1	1	K02942+K02935	ko03010
